# Supplementary material for: Non−Invasive Assessment, Classification, and Prediction of Biophysical Parameters Using Reflectance Hyperspectroscopy
Source: MDPI journal article supplement (doi:10.3390/plants12132526), 2023-07-02
Supplement: s1 [file s1]

# Non-Invasive Assessment, Classification, and Prediction of Biophysical Parameters Using Reflectance Hyperspectroscopy

Renan Falcioni <sup>1,\*</sup>, Glaucio Lebos Alemparte Abrantes dos Santos <sup>1</sup>, Luis Guilherme Teixeira Crusiol <sup>2</sup>, Werner Camargos Antunes <sup>1</sup>, Marcelo Luiz Chicati <sup>1</sup>, Roney Berti de Oliveira <sup>1</sup>, José A. M. Demattê <sup>3</sup> and Marcos Rafael Nanni <sup>1</sup>

<sup>1</sup> Department of Agronomy, State University of Maringá, Av. Colombo, 5790, Maringá 87020-900, Paraná, Brazil; glaucioalemparte@gmail.com (G.L.A.A.d.S.); wcantunes@uem.br (W.C.A.); mlchicati@uem.br (M.L.C.); rboliveira@uem.br (R.B.d.O.); mrnanni@uem.br (M.R.N.)

<sup>2</sup> Embrapa Soja (National Soybean Research Center–Brazilian Agricultural Research Corporation), Rodovia Carlos João Strass, s/nº, Distrito de Warta, Londrina 86001-970, Paraná, Brazil; luis.crusiol@colaborador.embrapa.br

<sup>3</sup> Department of Soil Science, Luiz de Queiroz College of Agriculture, University of São Paulo, Av. Pádua Dias, 11, Piracicaba 13418-260, São Paulo, Brazil; jamdemat@usp.br

\* Correspondence: renanfalcioni@gmail.com; Tel.: +55-4430118940

**Table S1.** Vegetation indices parameters applied for *Nicotiana tabacum* L. leaves of plants grown in high irradiance (full light) and low light (8.5% of full light) environments and submitted to a distinct gibberellin regime.

| Index                                                                       | Equation                                               | Reference |
|-----------------------------------------------------------------------------|--------------------------------------------------------|-----------|
| NDVI <sub>680</sub> = Normalized Difference Vegetation Index q680           | $(R_{800}-R_{680})/(R_{800}+R_{680})$                  | [71]      |
| NDVI <sub>750</sub> = Normalized Difference Vegetation Index q750           | $(R_{750}-R_{705})/(R_{750}+R_{705})$                  | [71]      |
| SR <sub>680</sub> = Simple Ratio Index q680                                 | $(R_{800}/R_{680})$                                    | [71]      |
| SR <sub>705</sub> = Simple Ratio Index q705                                 | $(R_{750})/(R_{705})$                                  | [95]      |
| mSR <sub>705</sub> = Modified Normalized Simple Ratio q705                  | $(R_{750}-R_{445})/(R_{705}+R_{445})$                  | [96]      |
| mNDVI <sub>750</sub> = Modified Normalized Difference Vegetation Index q750 | $(R_{750}-R_{705})/(R_{750}+R_{705}-2 \times R_{445})$ | [97]      |
| RARS = Ratio Analysis of Reflectance Spectra                                | $(R_{746})/(R_{513})$                                  | [98]      |
| Achl = Absorption of Chlorophyll Index                                      | $(R_{550})/(R_{500})$                                  | [99]      |
| BNb = Index for Chlorophyll Content                                         | $(R_{800})/(R_{550})$                                  | [99]      |
| PVR = Normalized Difference Photosynthetic                                  | $(R_{550}-R_{650})/(R_{550}+R_{650})$                  | [97]      |
| PSND = Pigment Specific Normalized Difference                               | $(R_{800}-R_{470})/(R_{800}+R_{470})$                  | [100]     |
| PSSRa = Pigment Specific Simple Ratio Chl <i>a</i>                          | $(R_{800})/(R_{680})$                                  | [98]      |
| PSSRb = Pigment Specific Simple Ratio Chl <i>b</i>                          | $(R_{800})/(R_{635})$                                  | [95]      |
| PSSRc = Pigment-specific Simple Ratio                                       | $(R_{800})/(R_{500})$                                  | [95]      |
| PSRI = Plant Senescence Reflectance Index                                   | $(R_{680}-R_{500})/(R_{750})$                          | [97]      |
| PSRI2 = Plant Senescence Reflectance Index 2                                | $(R_{672})/(R_{550}+R_{708})$                          | [97]      |
| MSI = Moisture Stress Index                                                 | $(R_{1650}/R_{830})$                                   | [99]      |
| PRI = Photochemical Reflectance Index                                       | $(R_{530}-R_{570})/(R_{530}+R_{570})$                  | [101]     |
| FR = Fluorescence Ratio                                                     | $(R_{690})/(R_{740})$                                  | [102]     |
| WBI = Water Band Index                                                      | $(R_{900})/(R_{970})$                                  | [103]     |
| DSWI = Disease-Water Stress Index                                           | $(R_{802}+R_{547})/(R_{1657}+R_{682})$                 | [97]      |
| DSWI-5 = Disease-Water Stress Index 5                                       | $(R_{800}-R_{550})/(R_{1660}+R_{680})$                 | [97]      |

|                                               |                                                                                 |       |
|-----------------------------------------------|---------------------------------------------------------------------------------|-------|
| CRI1 = Carotenoid Reflectance Index 1         | $(1/R_{510}) - (1/R_{550})$                                                     | [98]  |
| CRI2 = Carotenoid Reflectance Index 2         | $(1/R_{510}) - (1/R_{700})$                                                     | [71]  |
| ARI1 = Anthocyanin Reflectance Index          | $(1/R_{550}) - (1/R_{700})$                                                     | [100] |
| ARI2 = Anthocyanin Reflectance Index 2        | $R_{800} \times ((1/R_{550}) - (1/R_{700}))$                                    | [71]  |
| FRI = Flavonol Reflectance Index              | $R_{800} \times ((1/R_{410}) - (1/R_{460}))$                                    | [99]  |
| VOG1 = Vogelmann Index 1                      | $(R_{740}) / (R_{720})$                                                         | [99]  |
| VOG2 = Vogelmann Index 2                      | $(R_{734} - R_{747}) / (R_{715} + R_{726})$                                     | [100] |
| SIPI = Structurally Insensitive Pigment Index | $(R_{800} - R_{445}) / (R_{800} - R_{680})$                                     | [104] |
| CAI1 = Cellulose Absorption Index 1           | $100 \times (0.5(R_{2030} + R_{2210}) - R_{2100})$                              | [74]  |
| CAI2 = Cellulose Absorption Index 2           | $0.5 \times (R_{2020} + R_{2220}) - R_{2100}$                                   | [74]  |
| NDLI = Normalized Difference Lignin Index     | $[\log(1/R_{1754}) - \log(1/R_{1680})] / [\log(1/R_{1754}) + \log(1/R_{1680})]$ | [78]  |
| NDNI = Normalized Difference Nitrogen Index   | $[\log(1/R_{1510}) - \log(1/R_{1680})] / [\log(1/R_{1510}) + \log(1/R_{1680})]$ | [78]  |

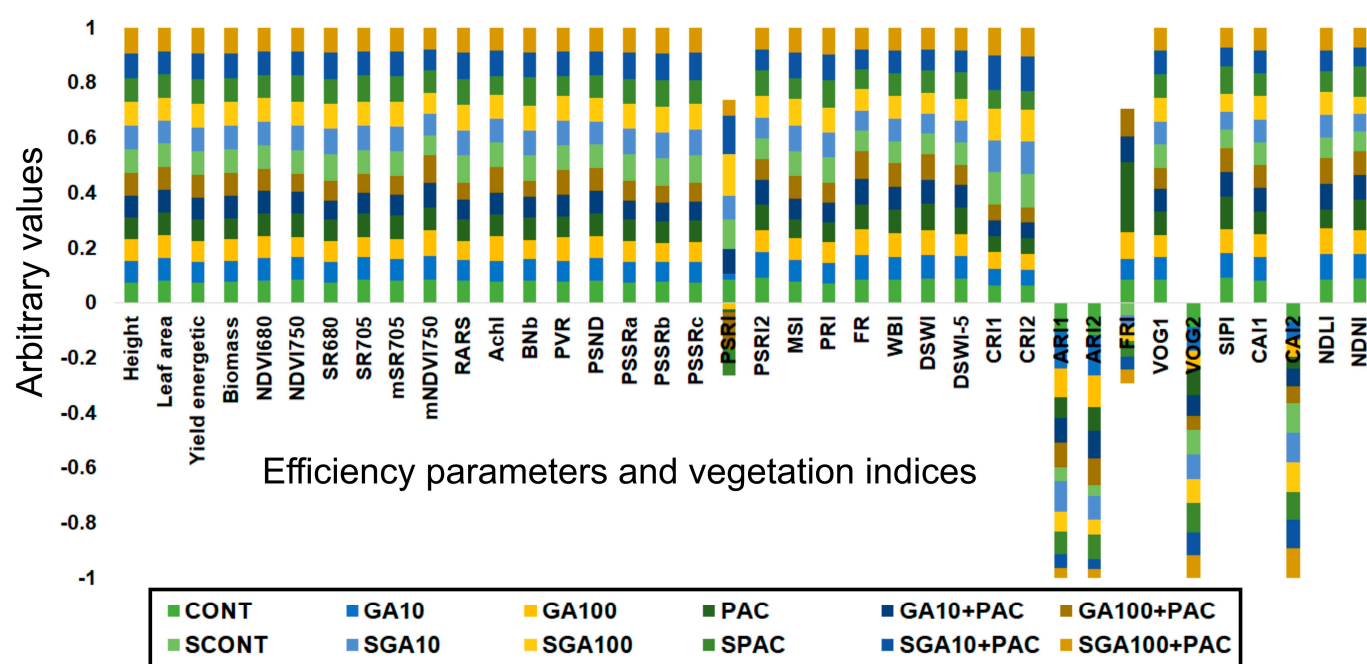

**Figure S1.** Vegetation index parameters calculated for arbitrary values (%) on *Nicotiana tabacum* L. leaves of plants grown in high irradiance (full light) and low-light (8.5% of full light) environments and submitted to distinct gibberellin regimes. For abbreviations, see Figure 1 and Table S1.

## References

- Gitelson, A.; Merzlyak, M.N. Spectral Reflectance Changes Associated with Autumn Senescence of *Aesculus hippocastanum* L. and *Acer platanoides* L. Leaves. Spectral Features and Relation to Chlorophyll Estimation. *J. Plant Physiol.* **1994**, *143*, 286–292.
- Nagler, P.L.; Inoue, Y.; Glenn, E.P.; Russ, A.L.; Daughtry, C.S.T. Cellulose Absorption Index (CAI) to Quantify Mixed Soil–Plant Litter Scenes. *Remote Sens. Environ.* **2003**, *87*, 310–325.
- Serrano, L.; Peñuelas, J.; Ustin, S.L. Remote Sensing of Nitrogen and Lignin in Mediterranean Vegetation from AVIRIS Data: Decomposing Biochemical from Structural Signals. *Remote Sens. Environ.* **2002**, *81*, 355–364.

- 
95. Lang, M.; Stober, F.; Lichtenthaler, H.K. Fluorescence Emission Spectra of Plant Leaves and Plant Constituents. *Radiat. Environ. Biophys.* **1991**, *30*, 333–347.
  96. Stimson, H.C.; Breshears, D.D.; Ustin, S.L.; Kefauver, S.C. Spectral Sensing of Foliar Water Conditions in Two Co-Occurring Conifer Species: *Pinus edulis* and *Juniperus monosperma*. *Remote Sens. Environ.* **2005**, *96*, 108–118.
  97. Apan, A.; Held, A.; Phinn, S.; Markley, J. Formulation and Assessment of Narrow-Band Vegetation Indices from EO-1 Hyperion Imagery for Discriminating Sugarcane Disease. In Proceedings of the 2003 Spatial Sciences Institute Biennial Conference: Spatial Knowledge Without Boundaries (SSC2003), Canberra, Australia, 22–27 September 2003; pp. 1–13.
  98. Chappelle, E.W.; Kim, M.S.; McMurtrey, J.E. Ratio Analysis of Reflectance Spectra (RARS): An Algorithm for the Remote Estimation of the Concentrations of Chlorophyll A, Chlorophyll B, and Carotenoids in Soybean Leaves. *Remote Sens. Environ.* **1992**, *39*, 239–247.
  99. Pontius, J.; Martin, M.; Plourde, L.; Hallett, R. Ash Decline Assessment in Emerald Ash Borer-Infested Regions: A Test of Tree-Level, Hyperspectral Technologies. *Remote Sens. Environ.* **2008**, *112*, 2665–2676.
  100. Metternicht, G. Vegetation Indices Derived from High-Resolution Airborne Videography for Precision Crop Management. *Int. J. Remote Sens.* **2003**, *24*, 2855–2877.
  101. Blackburn, G.A. Spectral Indices for Estimating Photosynthetic Pigment Concentrations: A Test Using Senescent Tree Leaves. *Int. J. Remote Sens.* **1998**, *19*, 657–675.
  102. Merzlyak, M.N.; Chivkunova, O.B.; Solovchenko, A.E.; Naqvi, K.R. Light Absorption by Anthocyanins in Juvenile, Stressed, and Senescing Leaves. *J. Exp. Bot.* **2008**, *59*, 3903–3911.
  103. Gitelson, A. Nondestructive Estimation of Foliar Pigments (Chlorophylls, Carotenoids, and Anthocyanins) Contents: Evaluating a Semianalytical Three-Band Model. In *Hyperspectral Remote Sensing of Vegetation*; Thenkaail, P.S., Lyon, J.G., Huete, A., Eds.; CRC Press: New York, NY, USA, 2011; p. 782.
  104. Garbulsky, M.F.; Peñuelas, J.; Gamon, J.; Inoue, Y.; Filella, I. The Photochemical Reflectance Index (PRI) and the Remote Sensing of Leaf, Canopy and Ecosystem Radiation Use Efficiencies. A Review and Meta-Analysis. *Remote Sens. Environ.* **2011**, *115*, 281–297.
